# Supplementary material for: Multicenter validation of PIM3 and PIM2 in Brazilian pediatric intensive care units
Source: PubMed Central journal article supplement (PMC9795232; doi:10.3389/fped.2022.1036007), 2022-12-14
Supplement: Datasheet1.pdf [file Datasheet1.pdf]

## *Supplementary Material*

### **Performance of the PIM3 and PIM2 in 41,541 patients admitted to 22 Brazilian Pediatric Intensive Care Units**

Daniel Hilário Santos Genu, MD, MSc<sup>1</sup>; Fernanda Lima-Setta, MD, PhD<sup>1</sup>; José Colleti Jr, MD, PhD<sup>2</sup>; Daniela Carla de Souza, MD, PhD<sup>3</sup>; Sérgio D'Abreu Gama, MD<sup>4</sup>; Letícia Massaud Ribeiro, MD, MSc<sup>5</sup>; Ivan Pollastrini Pistelli, MD, PhD<sup>6</sup>; José Oliva Proença Filho, MD<sup>7</sup>; Thaís de Mello Cesar Bernardi, MD<sup>8</sup>; Taísa Roberta Ramos Nantes de Castilho, MD<sup>9</sup>; Manuela Guimarães Clemente, MD<sup>10</sup>; Cibele Cristina Manzoni Ribeiro Borsetto, MD<sup>11</sup>; Luiz Aurelio de Oliveira, MD<sup>12</sup>; Thallys Ramalho Suzart Alves, MD<sup>13</sup>; Diogo Botelho Pedroso, MD<sup>14</sup>; Fabíola Peixoto Ferreira La Torre, MD<sup>15</sup>; Lunna Perdigão Borges<sup>16</sup>; Guilherme Santos<sup>16</sup>; Juliana Freitas de Mello e Silva, PhD<sup>1</sup>; Maria Clara de Magalhães-Barbosa, MD, PhD<sup>1</sup>; Antonio José Ledo Alves da Cunha, MD, PhD<sup>1,5</sup>; Marcio Soares, MD, PhD<sup>1,16</sup>; Arnaldo Prata-Barbosa, MD, PhD<sup>1,5</sup>, on behalf of the Brazilian Research Network in Pediatric Intensive Care (BRnet-PIC).

#### **1 Supplementary Material - Ethics**

The study protocol was approved by the following Institutional Review Boards:

- 1) Research Ethics Committee of the “D’Or Institute for Research and Education (IDOR)”, under the **n° 3,384,961**, which was responsible for the following hospitals, all from the D’Or Network of hospitals in Brazil:
  - a. in Rio de Janeiro, Brazil: Hospital Caxias D’Or, Hospital Copa D’Or, Hospital Oeste D’Or, Hospital Quinta D’Or, Hospital Real D’Or, Hospital Rios D’Or, Hospital Jutta Batista, Hospital Estadual da Criança, and Hospital Adão Pereira Nunes;
  - b. in São Paulo, SP: Hospital Ribeirão Pires, Hospital São Luiz São Caetano, Hospital São Luiz Anália Franco, and Hospital Sinobrasileiro;
  - c. in Brasília, DF: Hospital Santa Luzia and Hospital Santa Helena;
  - d. in Olinda, PE: Hospital Esperança.
- 2) Research Ethics Committee of the “Hospital e Maternidade São Luiz)”, under the **n° 3,558,506**, which was responsible for the following hospitals in São Paulo, Brazil: Hospital Brasil, Hospital São Luiz Jabaquara, and Hospital São Luiz Morumbi.
- 3) Research Ethics Committee of the Hospital Assunção, São Bernardo do Campo, SP, Brazil, under the **n° 3,805,463**.
- 4) Research Ethics Committee of the Hospital Sirio Libanês, São Paulo, SP, Brazil, under the **n° 3,573,580**.
- 5) Research Ethics Committee of the Instituto de Puericultura e Pediatria Martagão Gesteira, of the Federal University of Rio de Janeiro, Brazil, under the **n° 3,707,277**.

## 2 Supplementary Tables

TABLE S1 | Characteristics of the total study and patients who died.

| Patients' characteristics                | Total sample   |              | Deaths          |                |                 |
|------------------------------------------|----------------|--------------|-----------------|----------------|-----------------|
|                                          | No. (%)        | Absolute No. | %, total sample | %, by category | %, among deaths |
| No. of patients                          | 41,541 (100.0) | 763          | 1,84            |                |                 |
| Gender                                   |                |              |                 |                |                 |
| Female                                   | 18,490 (44.5)  | 346          | 0.83            | 1.87           | 45.35           |
| Male                                     | 22,765 (54.8)  | 413          | 0.99            | 1.81           | 54.13           |
| Missing                                  | 286 (0.7)      | 4            | 0.01            | 1.40           | 0.52            |
| Age (yrs), median (IQR)                  | 2 (0-5)        | 1 (0-5)      |                 |                |                 |
| Infant 1 (<12 mo.)                       | 13,811 (33.2)  | 325          | 0.78            | 2.35           | 42.60           |
| Infant 2 (12-23 mo.)                     | 10,483 (25.2)  | 176          | 0.42            | 1.68           | 23.07           |
| Preschool (2-5 yr.)                      | 7,382 (17.8)   | 79           | 0.19            | 1.07           | 10.35           |
| Grade schooler (6-12 yr.)                | 8,117 (19.5)   | 143          | 0.34            | 1.76           | 18.74           |
| Adolescent (13-16 yr.)                   | 1,748 (4.2)    | 40           | 0.10            | 2.29           | 5.24            |
| Type of admission                        |                |              |                 |                |                 |
| Medical                                  | 36,803 (88.6)  | 657          | 1.58            | 1.79           | 86.11           |
| Surgical                                 | 4,738 (11.4)   | 106          | 0.26            | 2.24           | 13.89           |
| Surgical group, type of admission        |                |              |                 |                |                 |
| Scheduled surgery                        | 2,840 (59.9)   | 64           | 0.15            | 2.25           | 8.39            |
| Emergency surgery                        | 1,898 (40.1)   | 42           | 0.10            | 2.21           | 5.50            |
| Source of PICU admission                 |                |              |                 |                |                 |
| Emergency department                     | 29,526 (71.1)  | 337          | 0.81            | 1.14           | 44.17           |
| Ward/floor                               | 3,681 (8.9)    | 134          | 0.32            | 3.64           | 17.56           |
| Operating room                           | 3,667 (8.8)    | 84           | 0.20            | 2.29           | 11.01           |
| Transfer from other hospital             | 3,002 (7.2)    | 148          | 0.36            | 4.93           | 19.40           |
| Other                                    | 1,665 (4.0)    | 60           | 0.14            | 3.60           | 7.86            |
| Support on first hour of admission       |                |              |                 |                |                 |
| Non-invasive ventilation, n (%)          | 4,378 (10.5)   | 91           | 0.22            | 2.08           | 11.93           |
| Invasive mechanical ventilation, n (%)   | 2,419 (5.8)    | 528          | 1.27            | 21.83          | 69.20           |
| Non-invasive/Invasive ventilation, n (%) | 6,797 (16.3)   | 619          | 1.49            | 9.11           | 81.13           |
| Vasopressors, n (%)                      | 1,130 (2.7)    | 335          | 0.81            | 25.57          | 43.91           |
| PICU length of stay (d), median (IQR)    | 3 (2-5)        | 7 (2-22)     |                 |                |                 |
| Readmissions, n (%)                      | 1,917 (4.6)    | 99           | 0.24            | 5.16           | 12.98           |
| Elective admissions, n (%)               | 3,814 (9.2)    | 88           | 0.21            | 2.31           | 11.53           |

**TABLE S2** | Observed and expected number of deaths and survivors across ten groups of risk.

|    | PIM 3           |            |        |       |           | PIM 2   |                 |            |        |       |           |        |
|----|-----------------|------------|--------|-------|-----------|---------|-----------------|------------|--------|-------|-----------|--------|
|    | No. of patients | PIM3 (%)   | Deaths |       | Survivors |         | No. of patients | PIM2 (%)   | Deaths |       | Survivors |        |
|    |                 |            | Obs.   | Exp.  | Obs.      | Exp.    |                 |            | Obs.   | Exp.  | Obs.      | Exp.   |
| 1  | 3708            | 0.00-0.15  | 5      | 5,1   | 3703      | 3702,89 | 4206            | 0.00-0.18  | 6      | 6.9   | 4.330     | 4329.1 |
| 2  | 4601            | 0.15-0.17  | 4      | 7,2   | 4597      | 4593,81 | 4123            | 0.18-0.24  | 11     | 9.2   | 4.259     | 4260.8 |
| 3  | 4154            | 0.17-0.23  | 7      | 8,2   | 4147      | 4145,85 | 4166            | 0.24-0.36  | 15     | 13.5  | 4.211     | 4212.5 |
| 4  | 4156            | 0.23-0.39  | 16     | 12,8  | 4140      | 4143,17 | 4658            | 0.36-0.75  | 30     | 27.3  | 4.351     | 4353.7 |
| 5  | 4202            | 0.39-1.21  | 47     | 28,2  | 4155      | 4173,78 | 3989            | 0.75-0.86  | 21     | 33.9  | 4.103     | 4172,4 |
| 6  | 4143            | 1.21-1.26  | 19     | 50,9  | 4124      | 4092,09 | 3925            | 0.86-0.99  | 35     | 38.3  | 4.024     | 4026,5 |
| 7  | 4188            | 1.26-1.42  | 23     | 55,9  | 4165      | 4132,11 | 4012            | 0.99-1.19  | 41     | 47.9  | 4.292     | 4197,0 |
| 8  | 4081            | 1.42-1.78  | 28     | 64,3  | 4053      | 4016,73 | 4154            | 1.19-1.59  | 65     | 57.4  | 4.031     | 4170,4 |
| 9  | 4159            | 1.78-3.28  | 74     | 97,8  | 4085      | 4061,16 | 4163            | 1.59-3.33  | 95     | 97.4  | 4.132     | 4118,5 |
| 10 | 4149            | 3.28-100.0 | 540    | 426,8 | 3609      | 3722,19 | 4145            | 3.33-100.0 | 467    | 541.6 | 3.758     | 3562,8 |

**TABLE S3** | Statistical data from the GiViTI calibration test.

| Calibration belt           | statistic | p-value   | $\beta_0$   | $\beta_1$   | $\beta_2$    | $\beta_3$    |
|----------------------------|-----------|-----------|-------------|-------------|--------------|--------------|
| PIM2 (totalperiod, 0-100%) | 55.742    | 7.078e-11 | -0.12986053 | 0.77822534  | -0.05761306  | 0            |
| PIM3 (totalperiod, 0-100%) | 74.314    | < 2.2e-16 | 0.461063853 | 0.934334733 | -0.091653228 | -0.009438559 |
| PIM2 (totalperiod, 0-5%)   | 48.975    | 9.48e-08  | 19.9075507  | 13.8708989  | 2.6723262    | 0.1818811    |
| PIM3 (totalperiod, 0-5%)   | 80.543    | < 2.2e-16 | 41.6931481  | 28.8661606  | 5.9649037    | 0.4114314    |
| PIM2 Period 1              | 15.413    | 0.01584   | 0.03746302  | 0.73960160  | -0.06350381  | 0            |
| PIM3 Period 1              | 4.2317    | 0.1205    | 0.1320599   | 0.9917300   | 0            | 0            |
| PIM2 Period 2              | 16.012    | 0.01212   | -0.14361229 | 0.74131244  | -0.05240984  | 0            |
| PIM3 Period 2              | 50.442    | 4.655e-08 | 0.84031820  | 1.03797804  | -0.08700228  | -0.01185569  |
| PIM2 Period 3              | 56.811    | 4.199e-11 | -0.21517607 | 0.84446101  | -0.05802483  | 0            |
| PIM3 Period 3              | 55.877    | 6.625e-11 | 0.17337021  | 0.81340745  | -0.08691097  | 0            |

Period 1: 2013-10-01 to 2015-09-30; Period 2: 2015-10-01 to 2017-09-30; Period 3: 2017-10-01 to 2019-09-30

## 3 Supplementary Figures

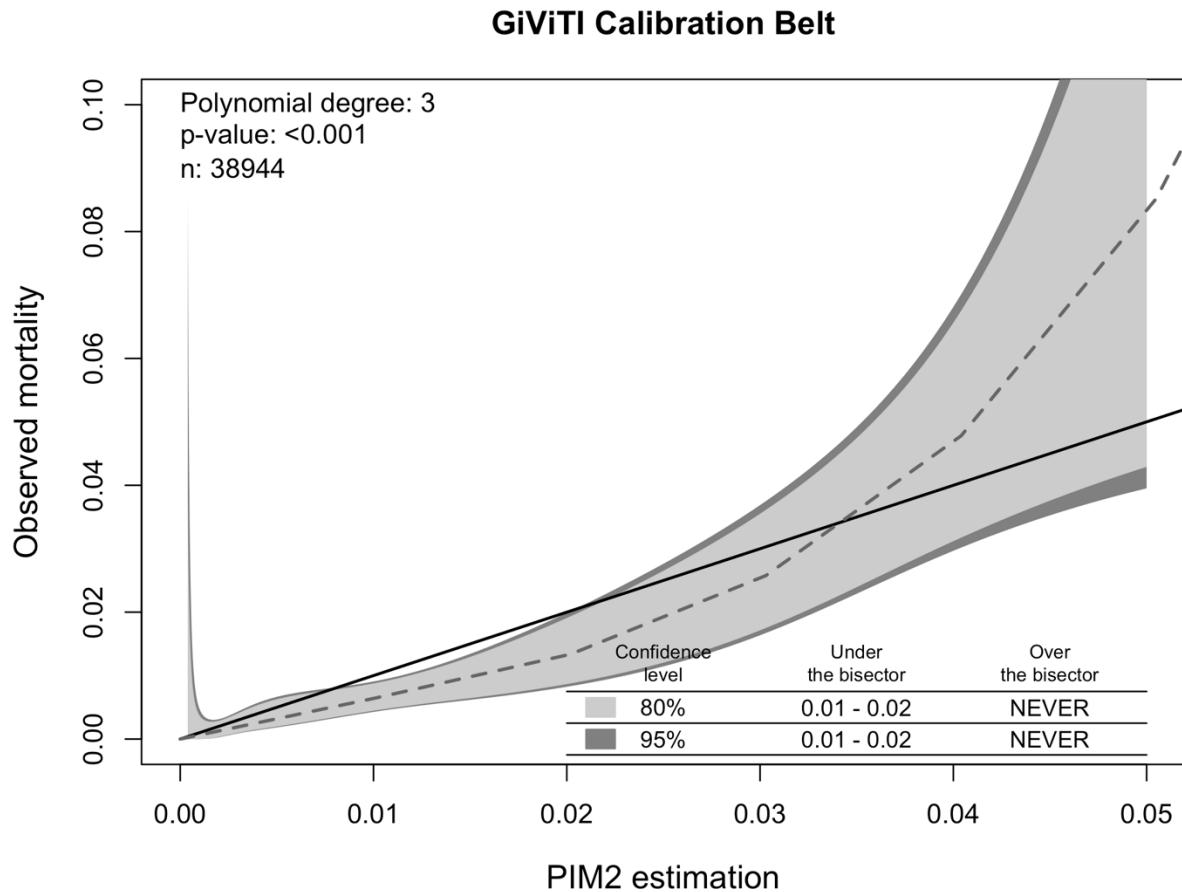

**Figure S1.** The PIM2 calibration belt for the risk range between 0 and 5% (about 94% of the population). The dashed curve represents the mean line compared to the bisector, which indicates a perfect match between the PIM2 results and the outcomes it tries to predict. The p-value expresses a Wald-like statistic that tests the null hypothesis that there is no difference between this line and the bisector, which was rejected. The belt (95% confidence interval) had adequate calibration in most of this risk range, never underestimating mortality, but a poor calibration between a small range between 1 and 2% risk of mortality, overestimating mortality in this group of patients.

### GiViTI Calibration Belt

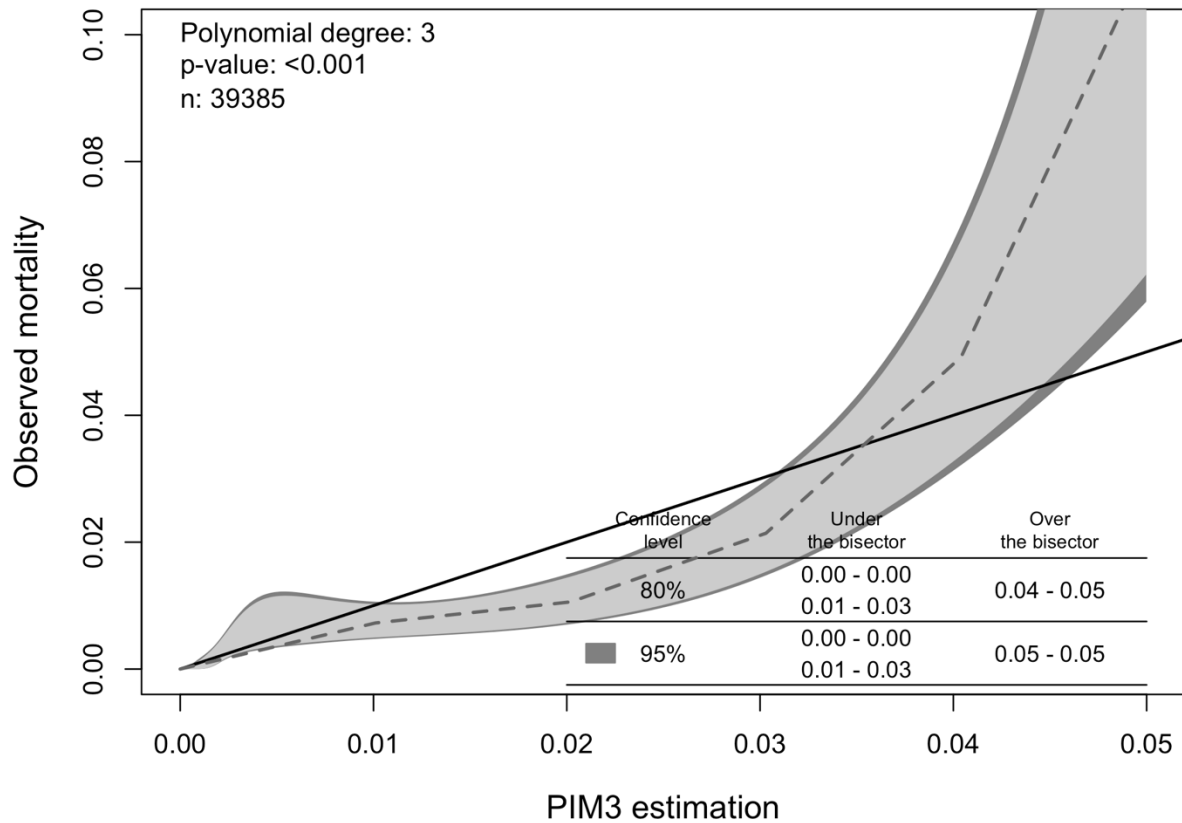

**Figure S2.** The PIM3 calibration belt for the risk range between 0 and 5% (about 95% of the population). The dashed curve represents the mean line compared to the bisector, which indicates a perfect match between the PIM3 results and the outcomes it tries to predict. The p-value expresses a Wald-like statistic that tests the null hypothesis that there is no difference between this line and the bisector, which was rejected. The belt (95% confidence interval) had a poor calibration between 1 and 3% risk of mortality (overestimating mortality in this group of patients) and above 4.5% (underestimating mortality). Calibration was only adequate in the range of 0-1% and 3-4.5% mortality risk.
